# Supplementary material for: Traditional Uses of Medicinal Plants in Polonnaruwa District in North Central Province of Sri Lanka
Source: Hindawi journal article supplement (doi:10.1155/2019/9737302), 2019-05-28
Supplement: f1 [file 9737302.f1.pdf]

# Supplementary-1

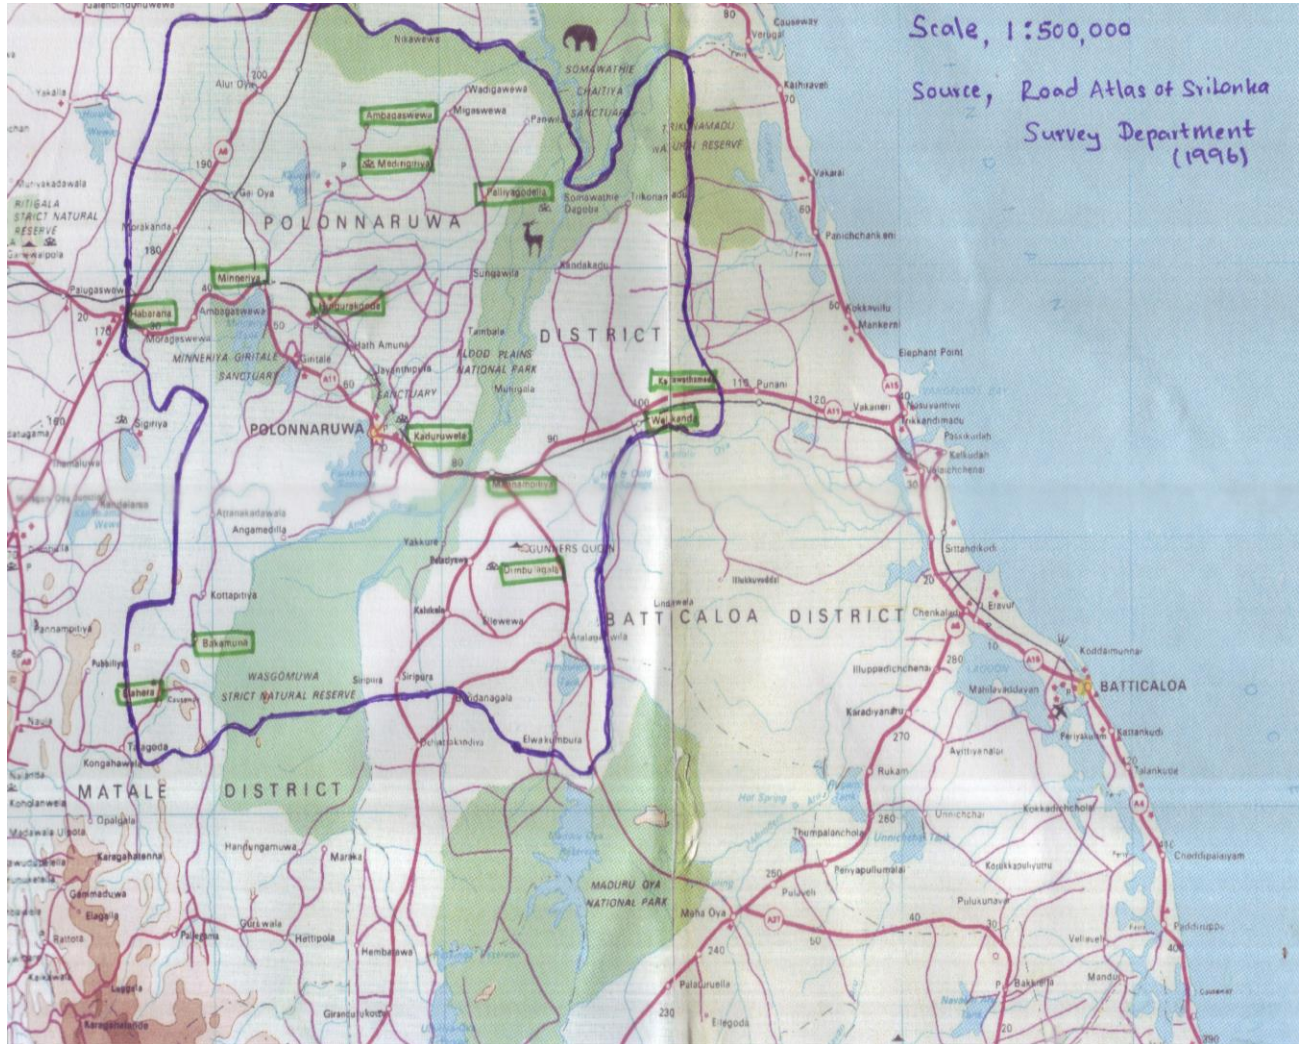

# Supplementary-2

## Questionnaire

### Personal Information

Location :

Divisional Secretary's Division:

Age (Years) :    30-45        46-60        61-75        above 75   

Gender    :    Male        Female   

Education :    Not attended school        1-11 years of school education   

                  12 years of school education        Diploma/ Degree and above   

### Medicinal plant usage

**Que.1.** Are you normally using any medicinal plant/plant preparation for any disease condition?

Yes        Please answer Que.2

No        Please answer Que.3

**Que.2.** (If you answered "Yes" to Que.1)

(2.1) **Why do you use herbal therapeutics ?**

I feel that these are safe/ have less side effects.

I had previous success with these.

Plant materials are readily available.

I could not bear the cost of other treatment methods.

Modern health care facilities are not available in my area.

I feel that other treatment methods could not cure my disease

Other reasons (please specify).....

(2.2) **At what stage/s of the disease you go for these treatments?**

Initial stage before going for any other medication

Simultaneously with other medications

In convalescence period

At the last stage, when other treatment methods fail

(2.3) **Since how many years you are using herbal therapeutics ? .....**

(2.4) Please provide information to fill the following table:

| Disease condition | Name of the plant | Plant part/s used | Preparation method | Administration route | Are you using any other additives ?<br>Eg. Honey, sugar,salt, ghee etc. | How do you obtain the plant material ?<br>Eg. Grown in the garden, purchase, collect from wild etc |
|-------------------|-------------------|-------------------|--------------------|----------------------|-------------------------------------------------------------------------|----------------------------------------------------------------------------------------------------|
|                   |                   |                   |                    |                      |                                                                         |                                                                                                    |

(2.5) **How did you acquire the knowledge on herbal therapeutics?**

- From ancestors  From neighbors/friends
- From traditional physicians  From my own experiences
- From audio/visual sources  Others (please specify).....

**Que.3. (If you answered “No” to Que.1)**

(3.1) **Have you ever used any kind of herbal therapeutics for the above mentioned disease conditions at any time of your life ?** Yes  No

(3.2) **Why you are not using herbal therapeutics ?**

- It takes more time to get cured
- It didn't work well when I used them earlier
- It's difficult to find the plant materials
- It's difficult to prepare
- I don't like the taste/smell
- I don't have any faith on these because scientifically not proven
- Other reasons (please specify) .....

(3.3) **Do you think that you would go for herbal therapeutics, if proper scientific investigations are done on them to prove the safety and efficacy?**

- Yes  No  Not sure
